# Supplementary material for: Generation of Comprehensive Ecosystem-Specific Reference Databases with Species-Level Resolution by High-Throughput Full-Length 16S rRNA Gene Sequencing and Automated Taxonomy Assignment (AutoTax)
Source: PubMed Central journal article supplement (PMC7512547; doi:10.1128/mbio.01557-20), 2020-09-22

Number of taxa that are assigned denovo names

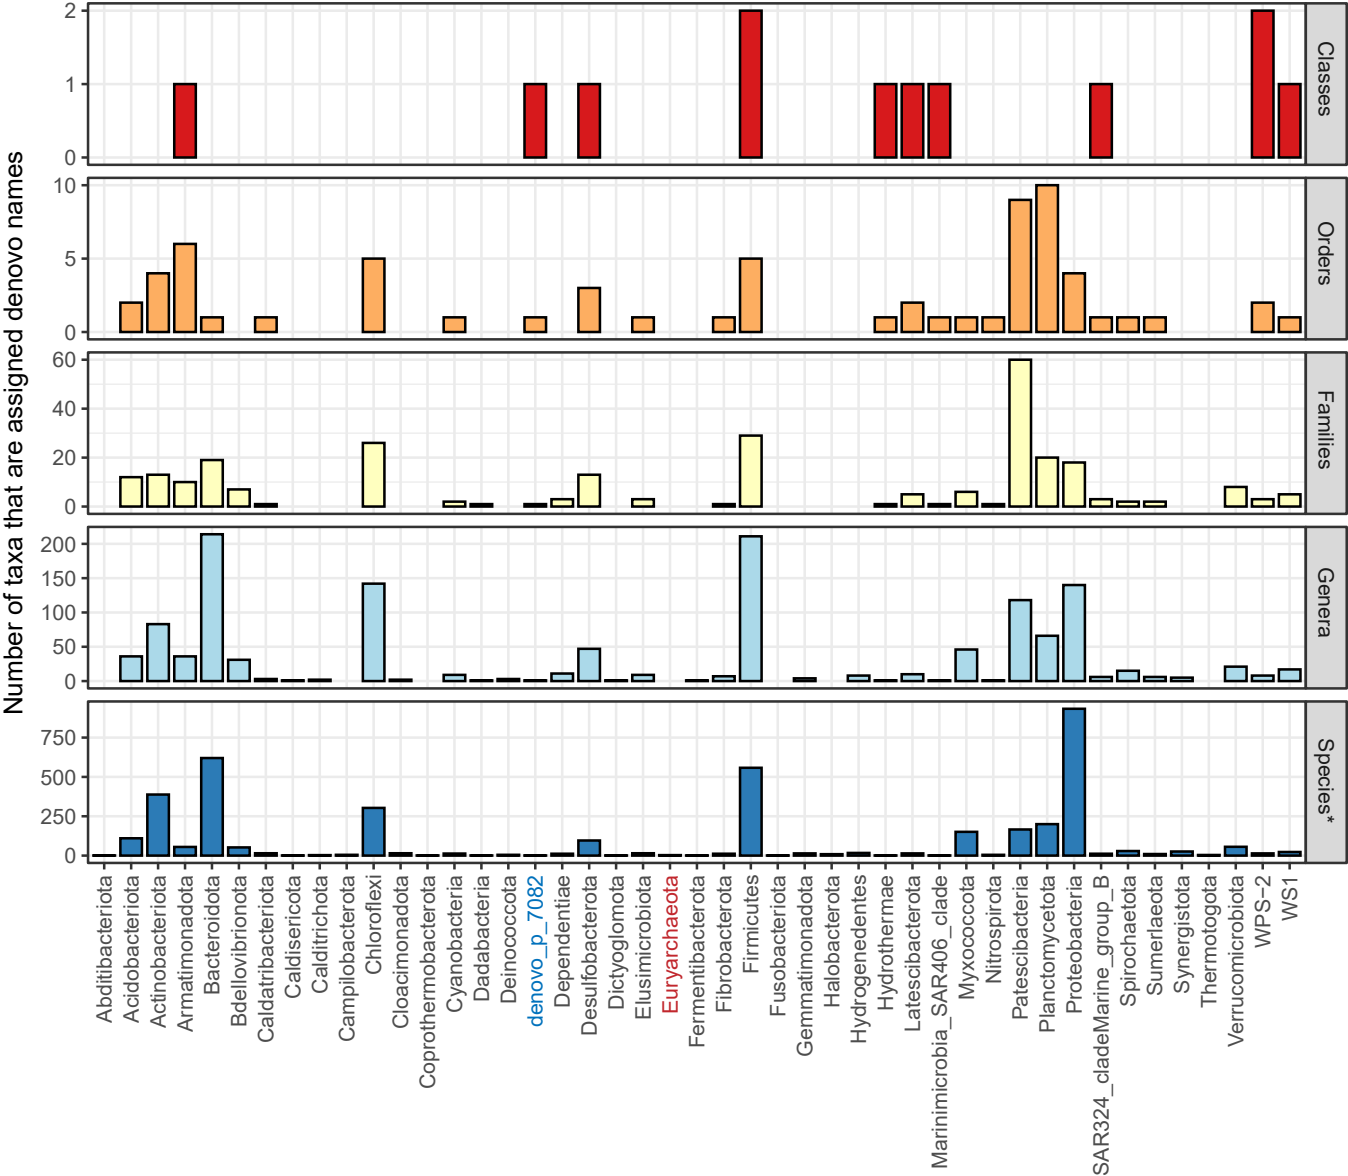

Supplement: mBio.01557-20-sf004.pdf [file mBio.01557-20-sf004.pdf]
